# Supplementary material for: Global Oxidative Status Is Linked to Calcific Aortic Stenosis: The Differences Due to Diabetes Mellitus and the Effects of Metformin
Source: MDPI journal article supplement (doi:10.3390/antiox12051024), 2023-04-28
Supplement: s1 [file s1]

# **Global Oxidative Status Is Linked to Calcific Aortic Stenosis: The Differences due to Diabetes Mellitus and the Effects of Metformin**

**Nerea Corbacho-Alonso <sup>1,2,†</sup>, Elena Rodríguez-Sánchez <sup>3,†</sup>, Tamara Sastre-Oliva <sup>1,2</sup>, Elisa Mercado-García <sup>3</sup>, Ines Perales-Sánchez <sup>1,2</sup>, Cristina Juarez-Alia <sup>1,2</sup>, Luis F. López-Almodovar <sup>4</sup>, Luis R. Padial <sup>5</sup>, Teresa Tejerina <sup>6</sup>, Laura Mourino-Alvarez <sup>1,2,‡</sup>, Gema Ruiz-Hurtado <sup>3,7,\*</sup> and María G. Barderas <sup>1,2,\*</sup>**

<sup>1</sup> Department of Vascular Physiopathology, Hospital Nacional de Parapléjicos, SESCAM, (Servicio de Salud de Castilla-La Mancha), 45071 Toledo, Spain

<sup>2</sup> Department of Vascular Physiopathology, Hospital Nacional de Parapléjicos, Instituto de Investigación Sanitaria de Castilla-La Mancha (IDISCAM), 45071 Toledo, Spain

<sup>3</sup> Cardioresenal Translational Laboratory, Instituto de Investigación Imas12, Hospital Universitario 12 de Octubre, 28041 Madrid, Spain

<sup>4</sup> Cardiac Surgery, Hospital General Universitario de Toledo, SESCAM, 45007 Toledo, Spain

<sup>5</sup> Department of Cardiology, Hospital General Universitario de Toledo, SESCAM, 45007 Toledo, Spain

<sup>6</sup> Department of Pharmacology, School of Medicine, Universidad Complutense de Madrid, 28040 Madrid, Spain;

<sup>7</sup> Centro de Investigación Biomédica en Red de Enfermedades Cardiovasculares, CIBER-CV Hospital Universitario 12 de Octubre, 28041 Madrid, Spain

\* Correspondence: gemaruiz@h12o.es (G.R.-H.); megonzalez@secam.jccm.es or marucitos@hotmail.com (M.G.B.); Tel.: +34-91-390-8001 (G.R.-H.); +34-925396826 (M.G.B.)

† These authors contributed equally to this work.

‡ These authors contributed equally to this work.

**Table S1.** Correlation of inflammatory markers with metformin treatment.

|                        | <i>r</i> | <i>p</i> -value |
|------------------------|----------|-----------------|
| <b>Leukocyte count</b> | 0.05     | 0.693           |
| <b>Fibrinogen</b>      | 0.18     | 0.337           |

**Table S2.** Statistical differences of oxidative damage and antioxidant defense markers. *p*-values from ANOVA *t*-test and Bonferroni post hoc are shown. C: control; CAS: calcific aortic stenosis; T2DM: diabetes mellitus type 2; Ns: non-significant; MET: metformin.

|                          | ANOVA | C vs<br>Total<br>CAS | C vs CAS +<br>T2DM +<br>MET | CAS vs<br>CAS +<br>T2DM +<br>MET |
|--------------------------|-------|----------------------|-----------------------------|----------------------------------|
| <b>Protein carbonyls</b> | 0.000 | 0.000                | ns                          | 0.000                            |
| <b>oxLDL</b>             | 0.005 | ns                   | 0.004                       | 0.216                            |
| <b>8-OHdG</b>            | 0.732 | ns                   | ns                          | ns                               |
| <b>XOD activity</b>      | 0.000 | 0.000                | ns                          | 0.000                            |
| <b>Catalase activity</b> | 0.001 | 0.003                | ns                          | 0.006                            |
| <b>SOD activity</b>      | 0.593 | ns                   | ns                          | ns                               |
| <b>TAC</b>               | 0.000 | 0.000                | 0.002                       | ns                               |
| <b>OxyScore</b>          | 0.000 | 0.002                | ns                          | 0.001                            |
| <b>AntioxyScore</b>      | 0.088 | ns                   | ns                          | ns                               |

**Table S3.** Correlation of fibrinogen levels with oxidative stress markers.

|                          | <i>r</i> | <i>p</i> -value |
|--------------------------|----------|-----------------|
| <b>Protein carbonyls</b> | −0.149   | 0.425           |
| <b>oxLDL</b>             | −0.009   | 0.454           |
| <b>8-OHdG</b>            | −0.081   | 0.665           |
| <b>XOD activity</b>      | −0.253   | 0.170           |
| <b>Catalase activity</b> | −0.117   | 0.532           |
| <b>SOD activity</b>      | −0.111   | 0.552           |
| <b>TAC</b>               | 0.014    | 0.939           |
| <b>OxyScore</b>          | −0.231   | 0.211           |
| <b>AntioxyScore</b>      | −0.129   | 0.488           |
